# Supplementary material for: Assessing the Association between Important Dietary Habits and Osteoporosis: A Genetic Correlation and Two-Sample Mendelian Randomization Study
Source: MDPI journal article supplement (doi:10.3390/nu14132656), 2022-06-27

# **Assessing the association between important dietary habits and osteoporosis: A genetic correlation and two-sample Mendelian randomization study**

## **Supplemental materials**

### **Supplemental Figure S1:**

**Forest plots of variant specific inverse variance estimates for the causal association between OP and candidate dietary habits.**

### **Supplemental Figure S2:**

**Scatterplots of the causal relationships between OP and candidate dietary habits.**

### **Supplemental Figure S3:**

**Funnel plots of the causal association between OP and candidate dietary habits.**

**Supplemental Figure S1:**

**Forest plots of variant specific inverse variance estimates for the causal association between OP and candidate dietary habits.**

**A:OP and candidate PC17**

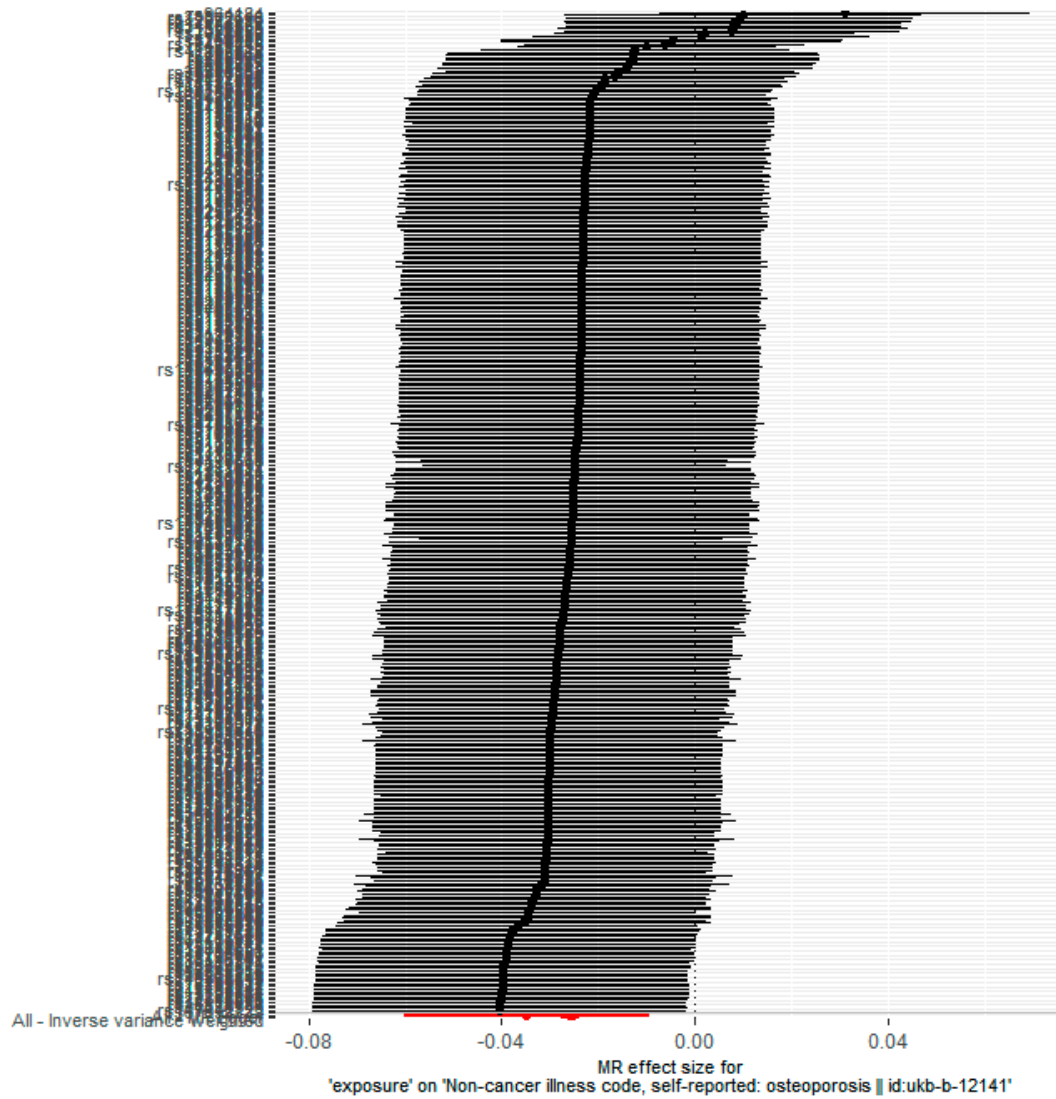

**B:OP and candidate PC35**

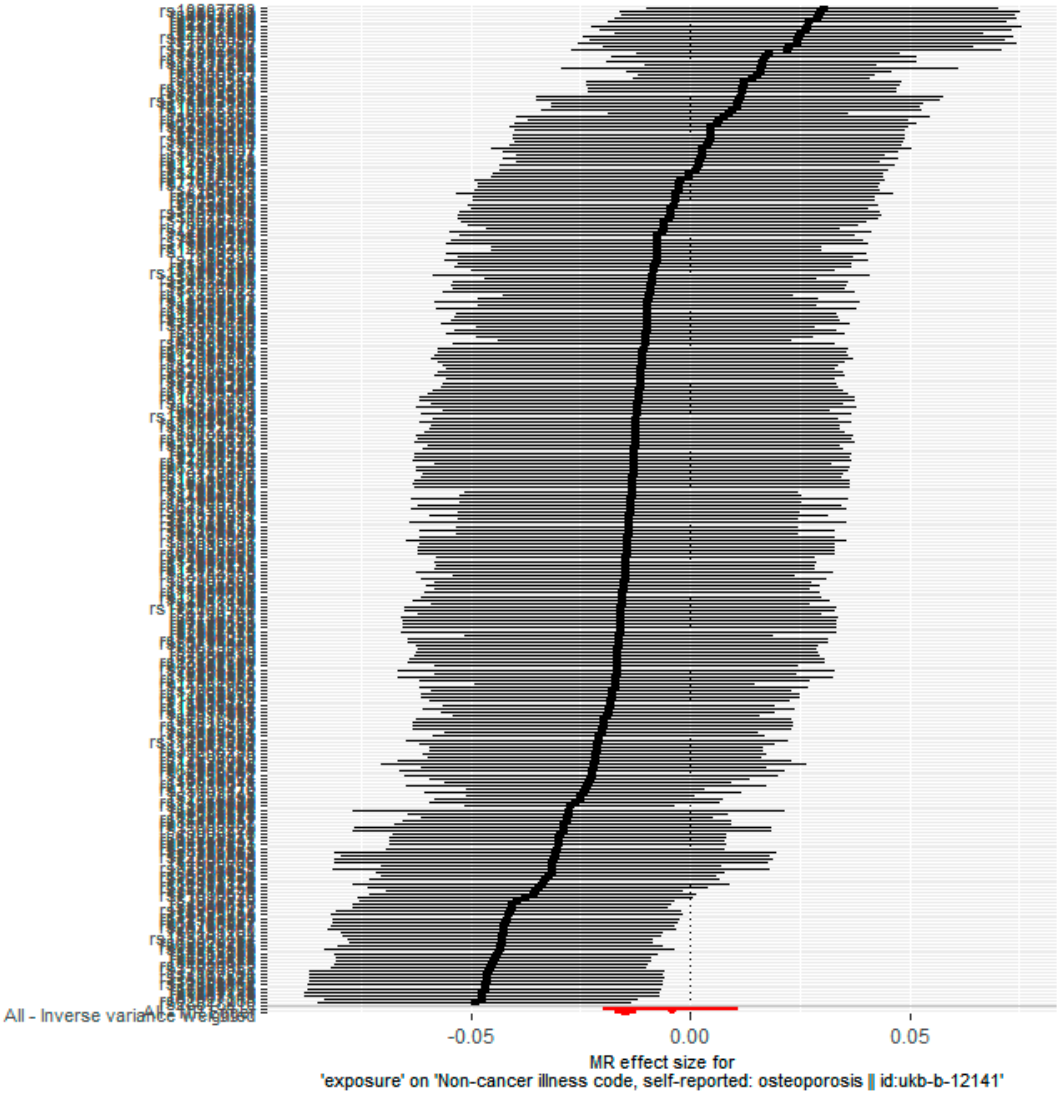

## C:OP and candidate PC36

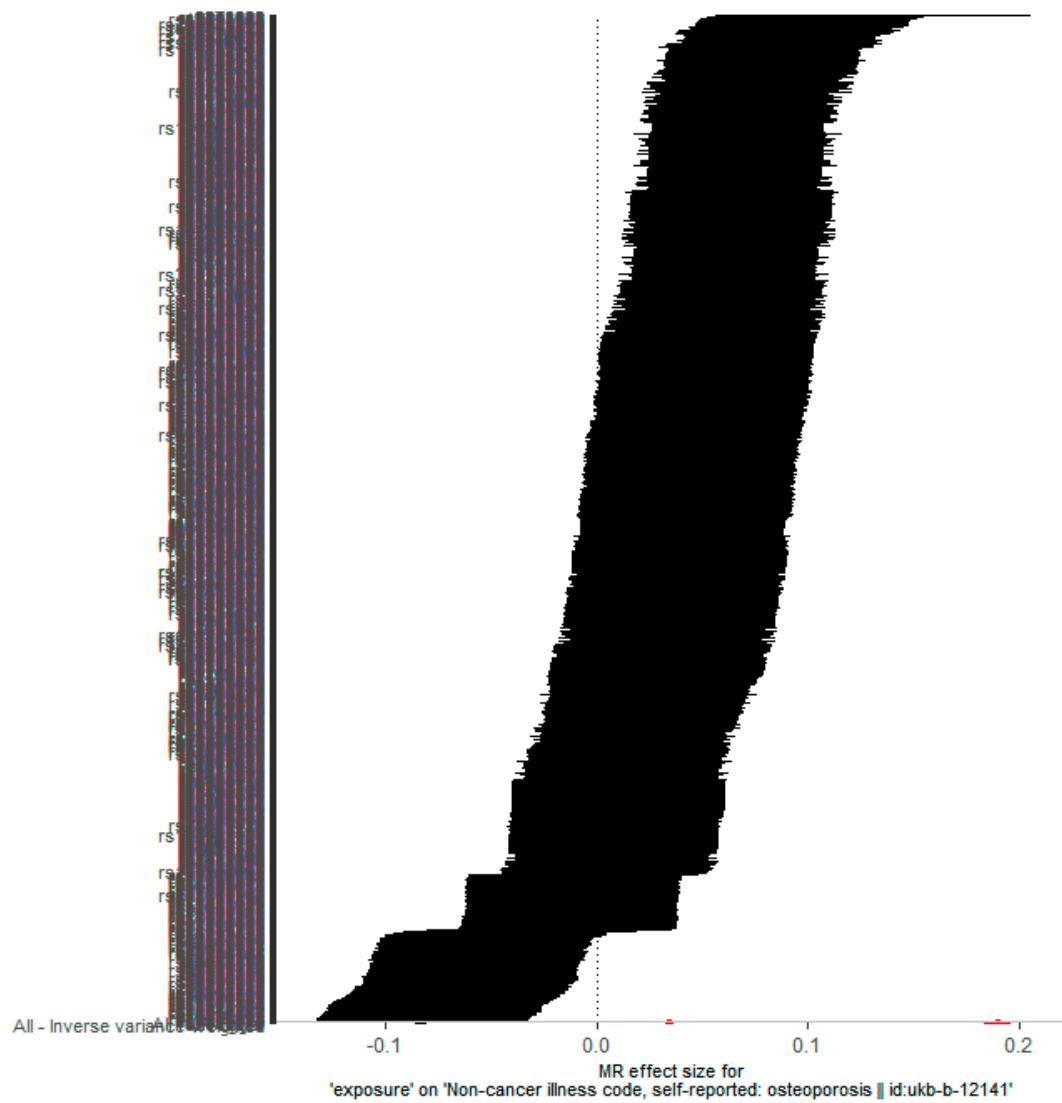

## D:OP and candidate PC39

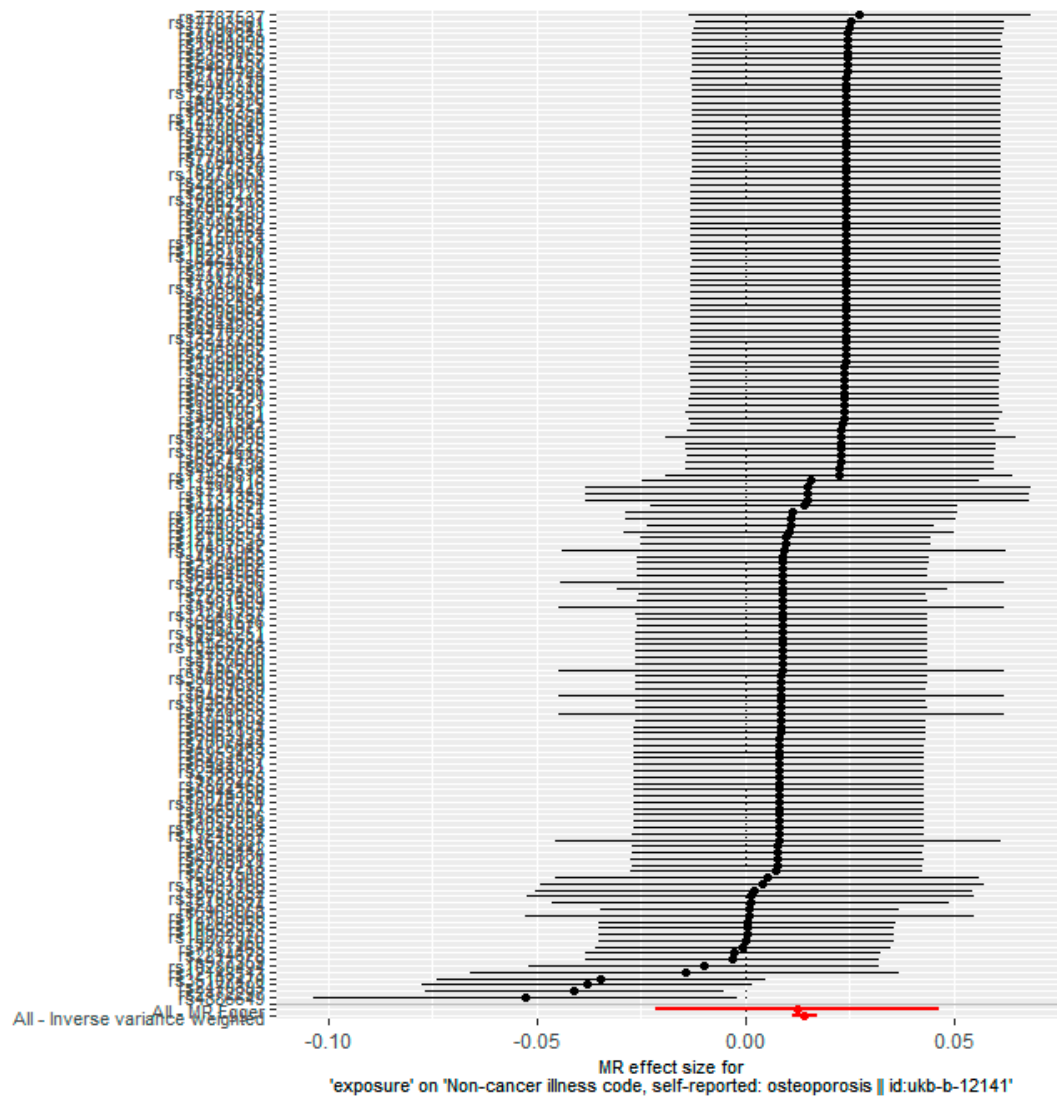

## E:OP and candidate tablespoons of raw vegetables per day

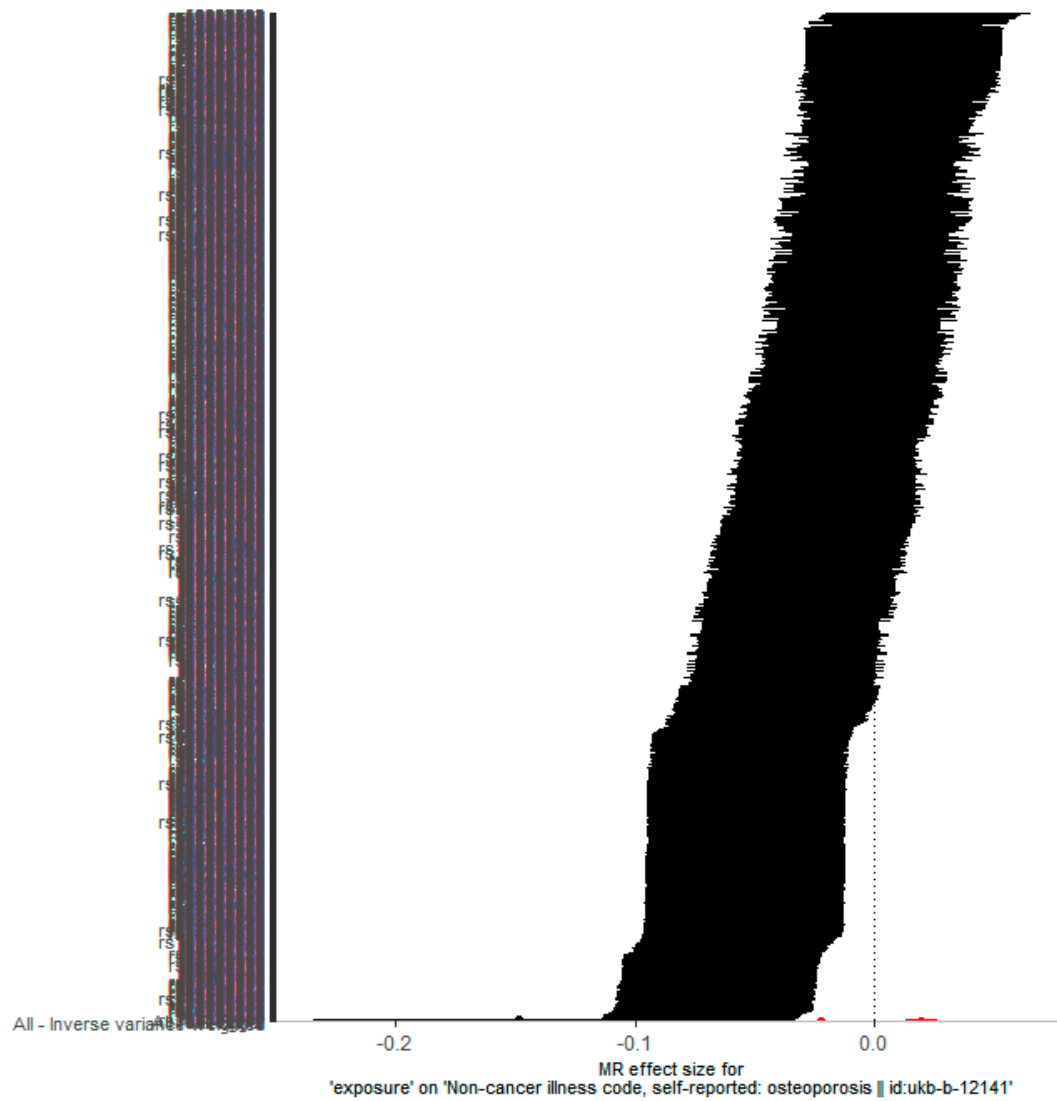

**Supplemental Figure S2:**

**Scatterplots of the causal relationships between OP and candidate dietary habits.**

**A:OP and candidate PC17**

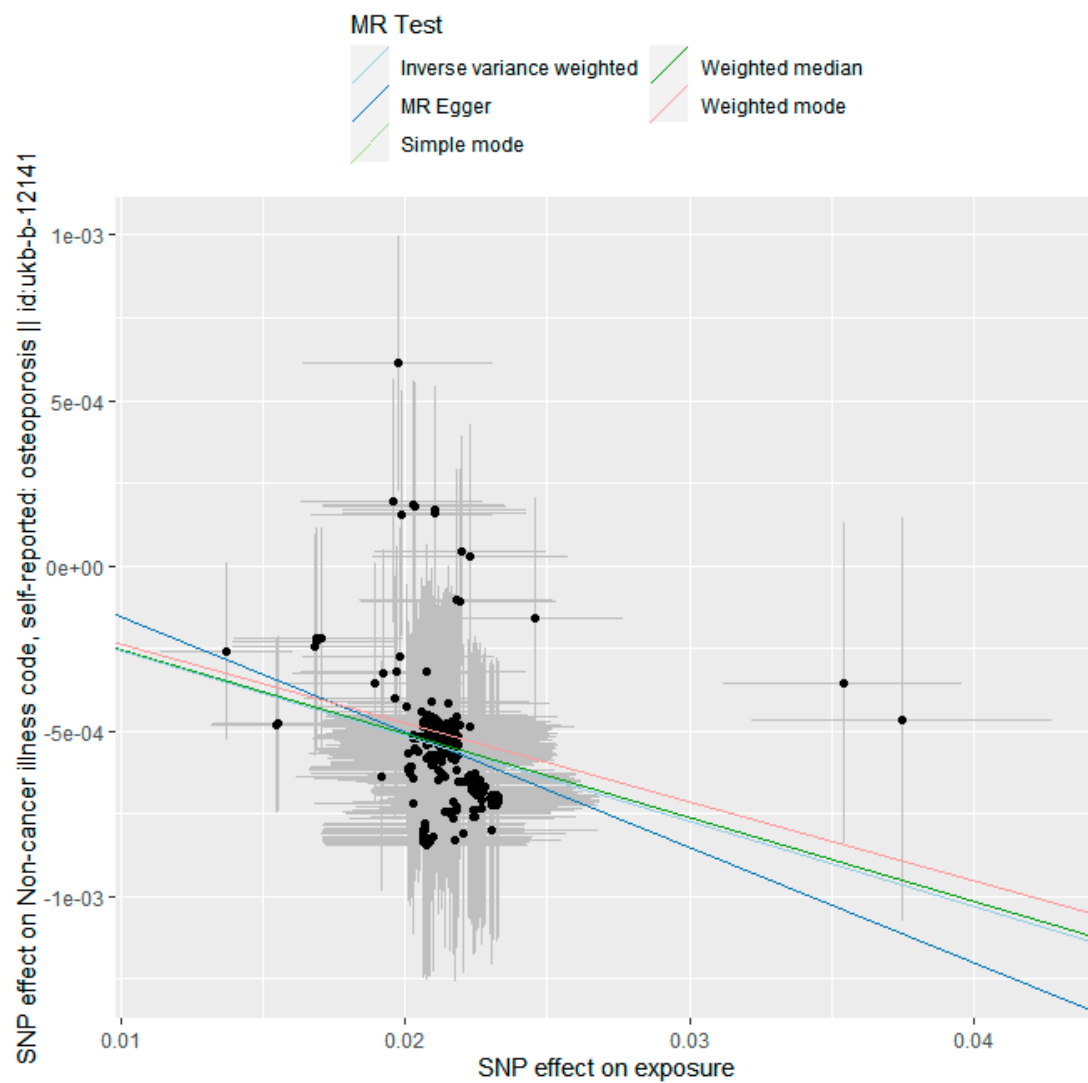

B:OP and candidate PC35

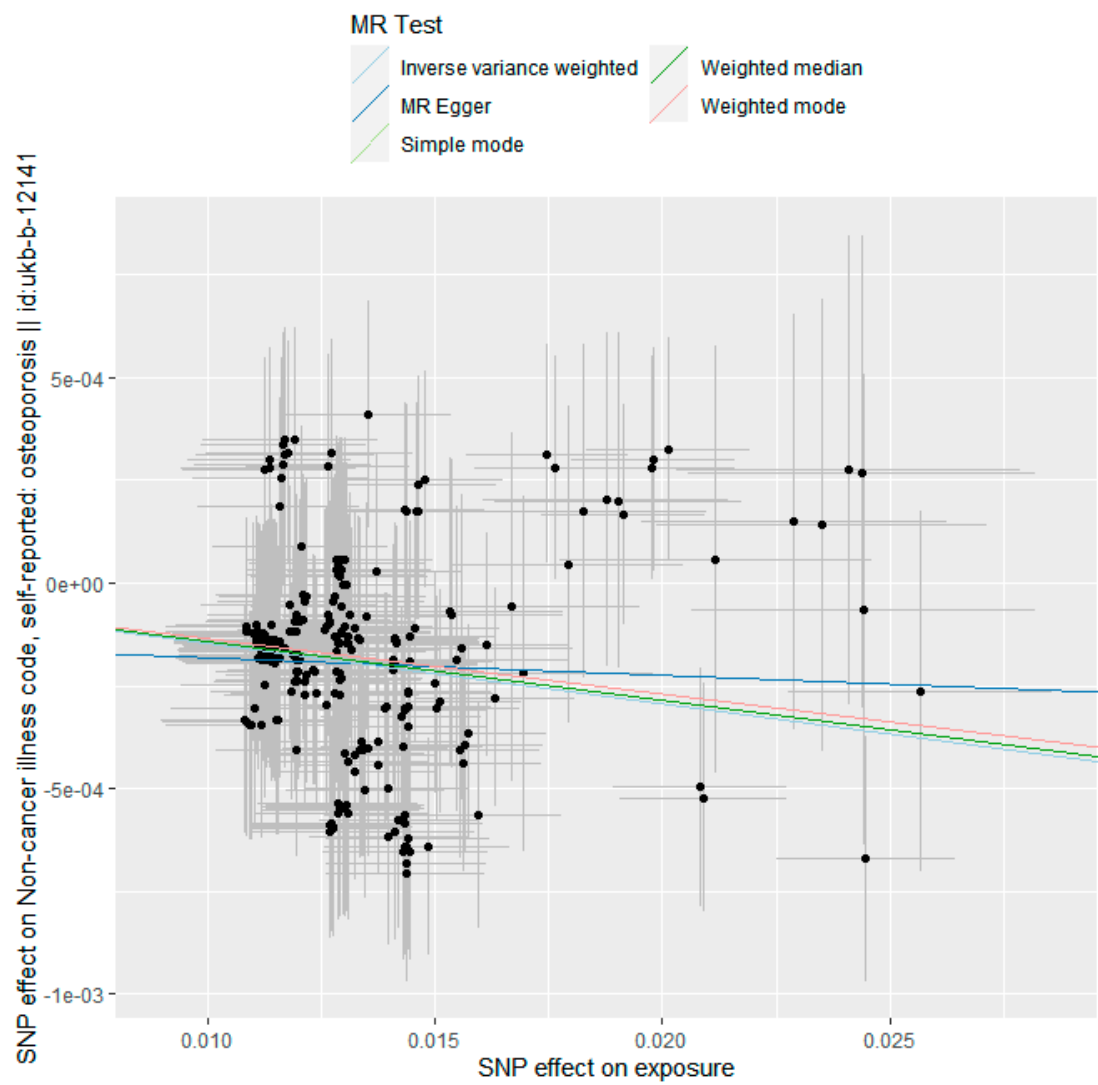



C:OP and candidate PC36

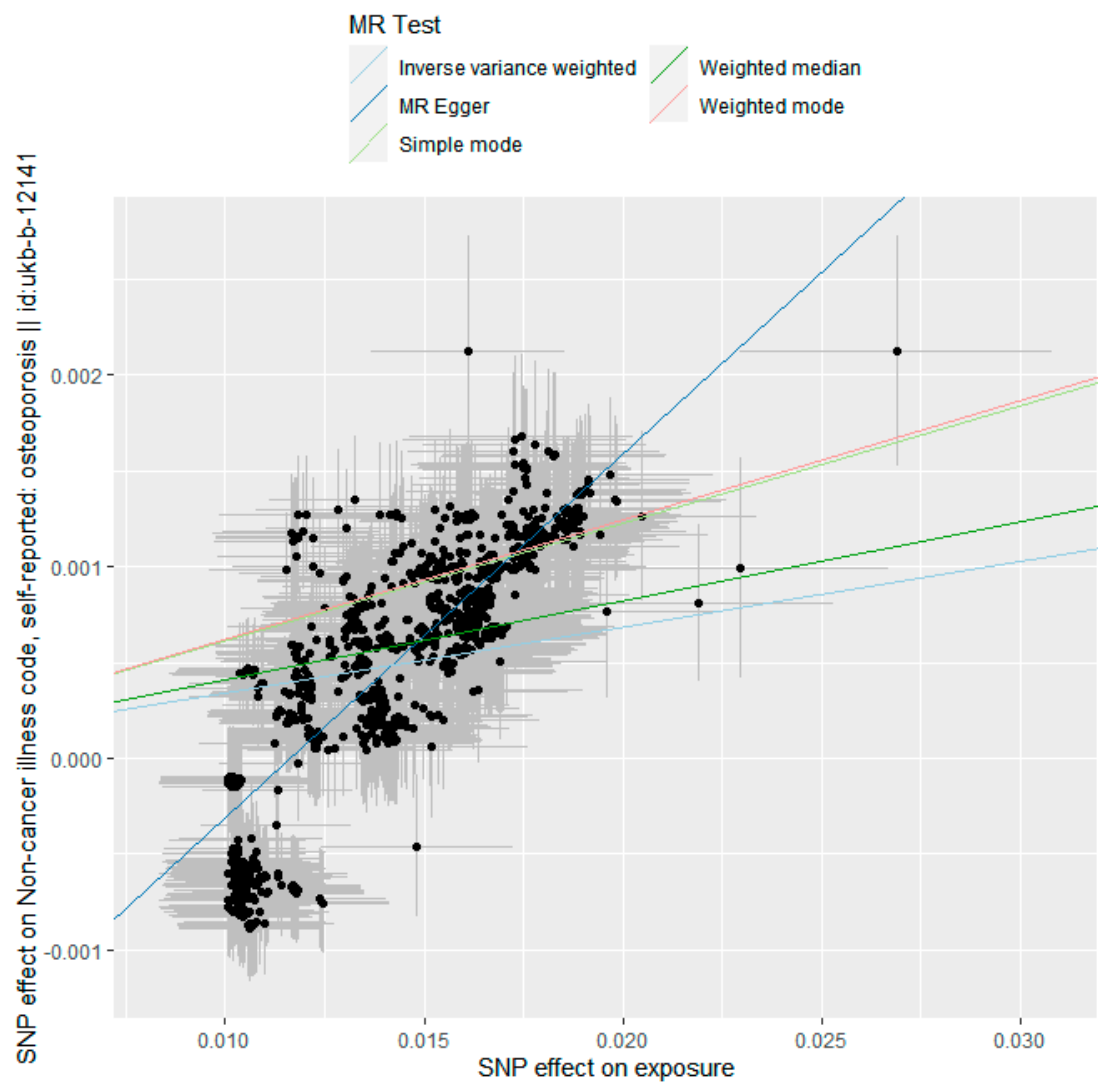

## D:OP and candidate PC39

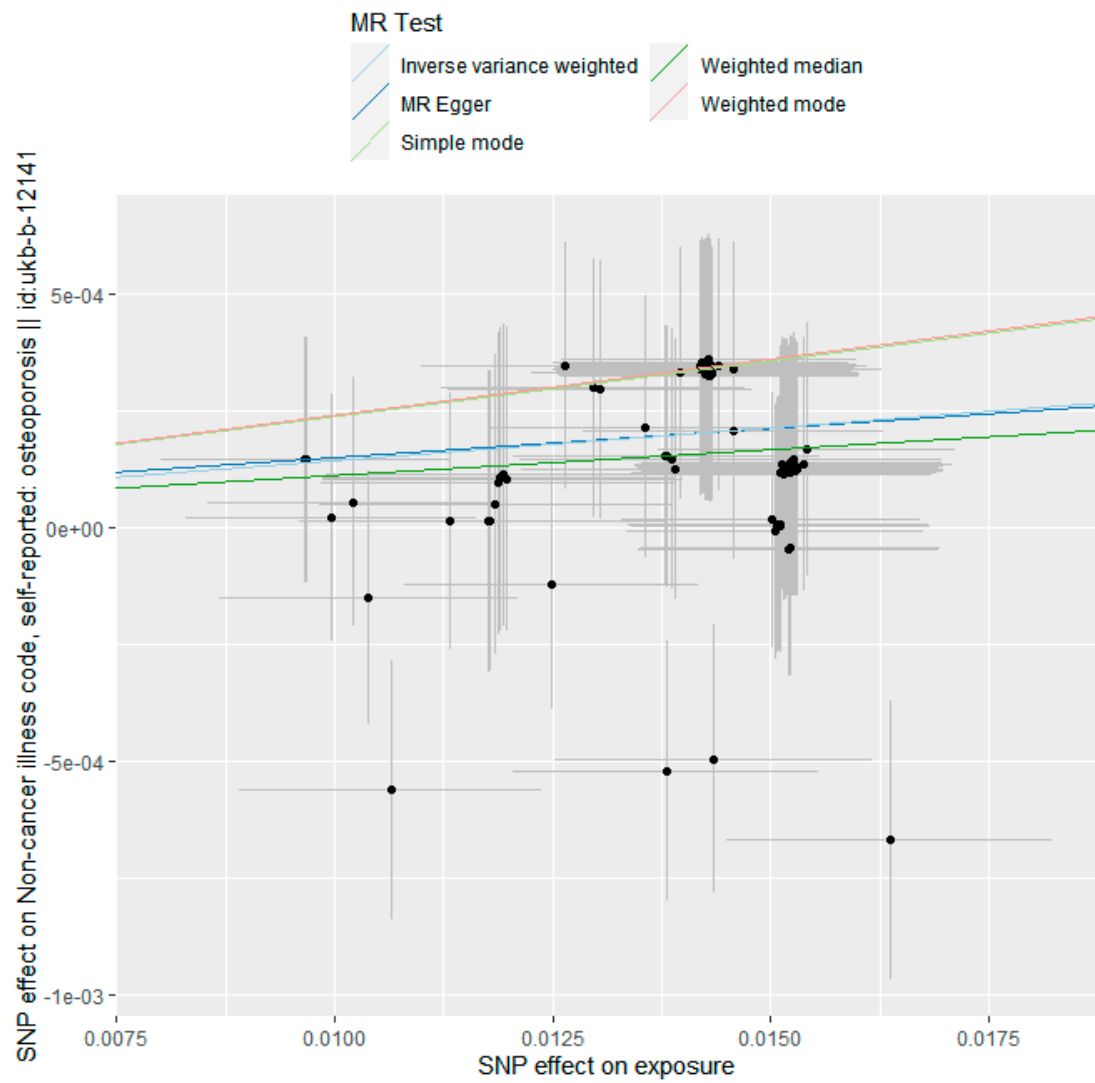

E:OP and candidate tablespoons of raw vegetables per day

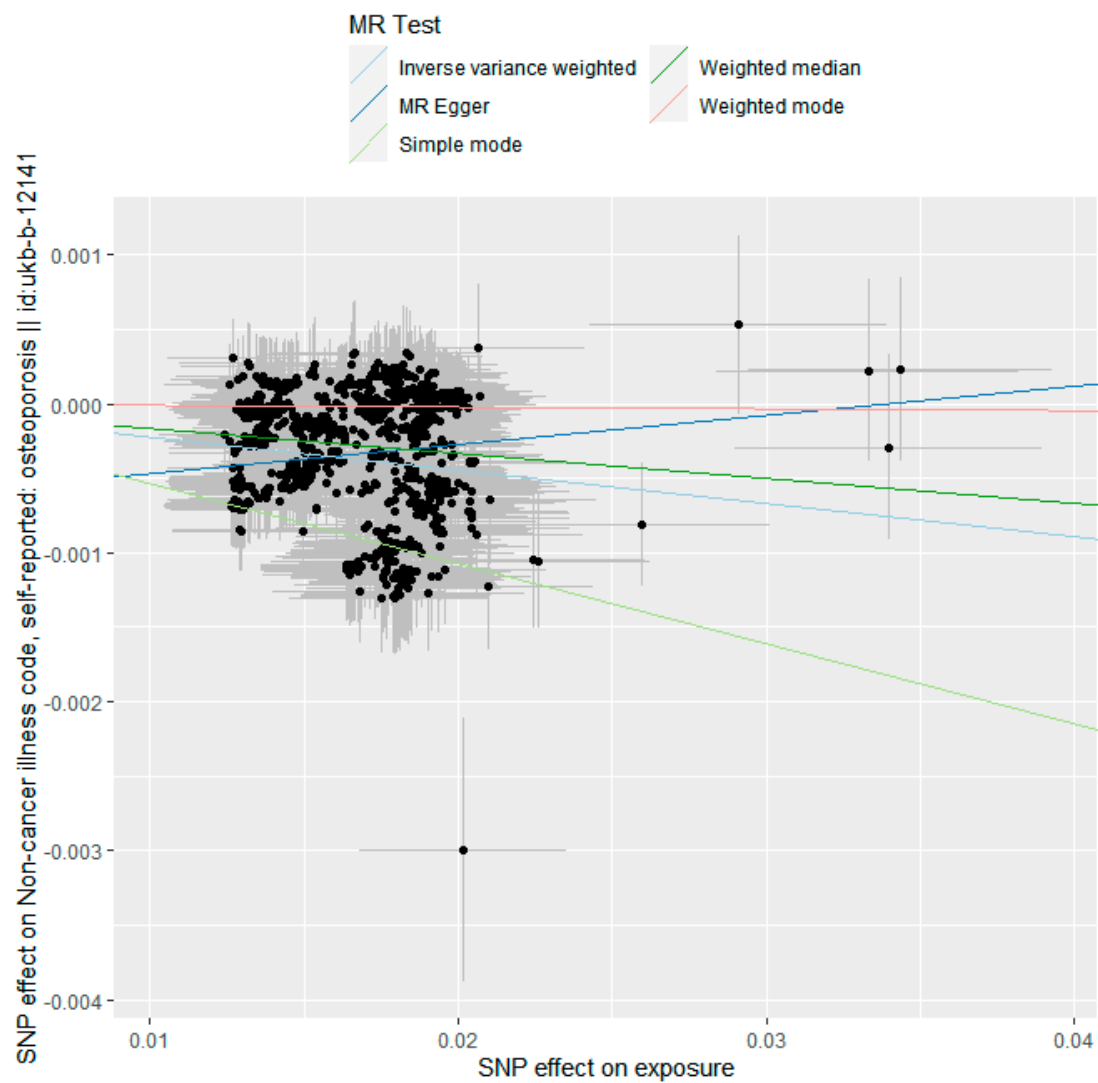

**Supplemental Figure S3:**

**Funnel plots of the causal association between OP and candidate dietary habits.**

**A:OP and candidate PC17**

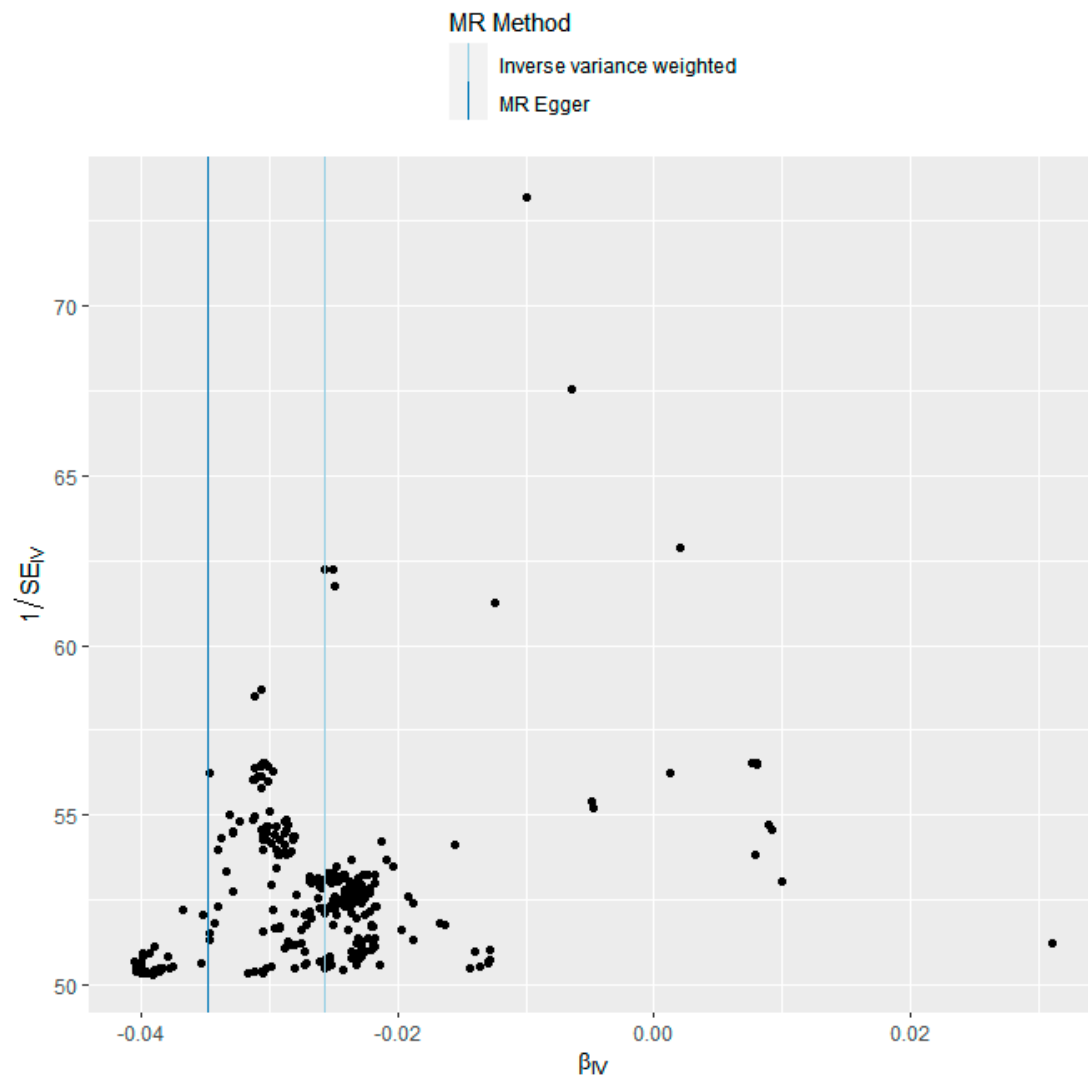

## B:OP and candidate PC35

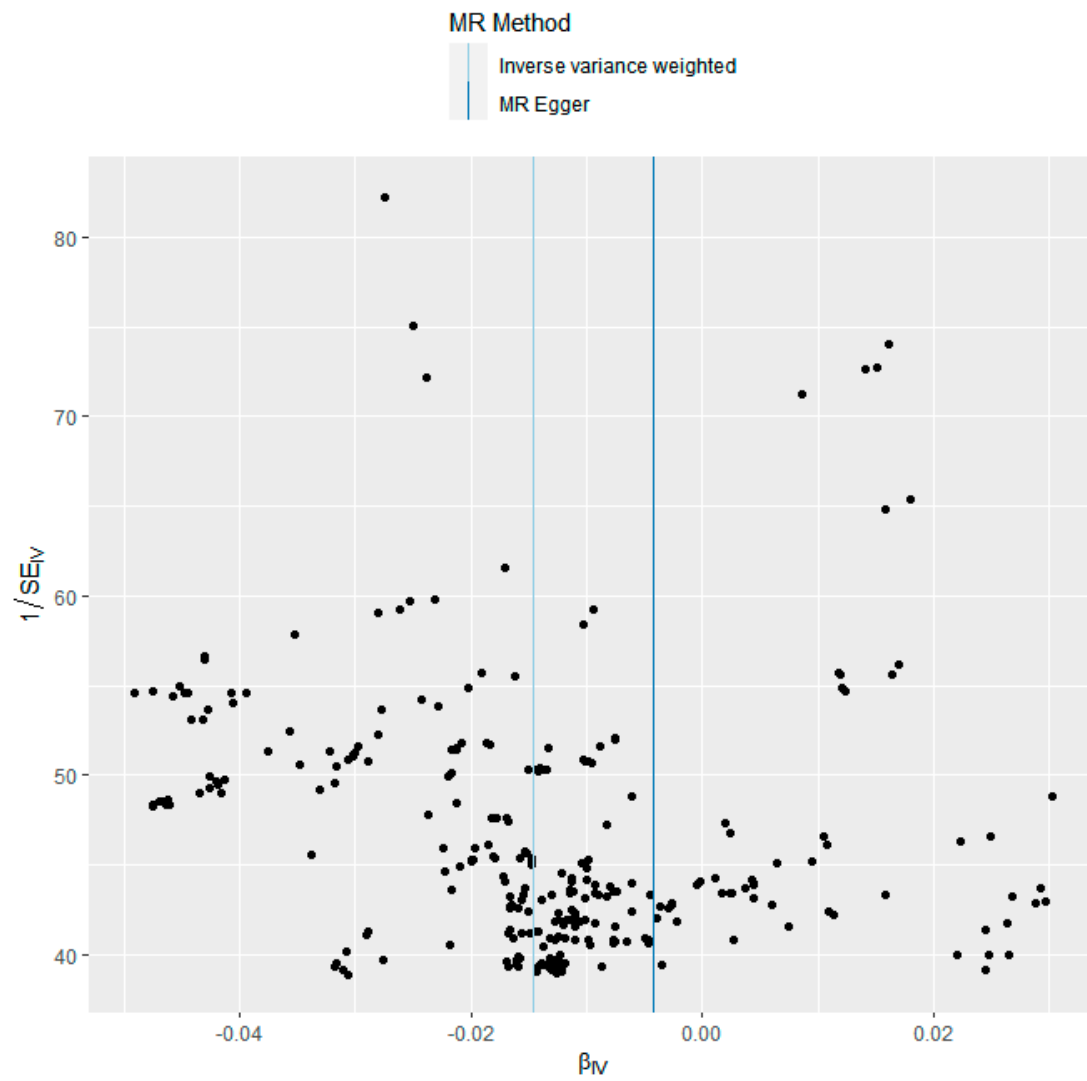

## C:OP and candidate PC36

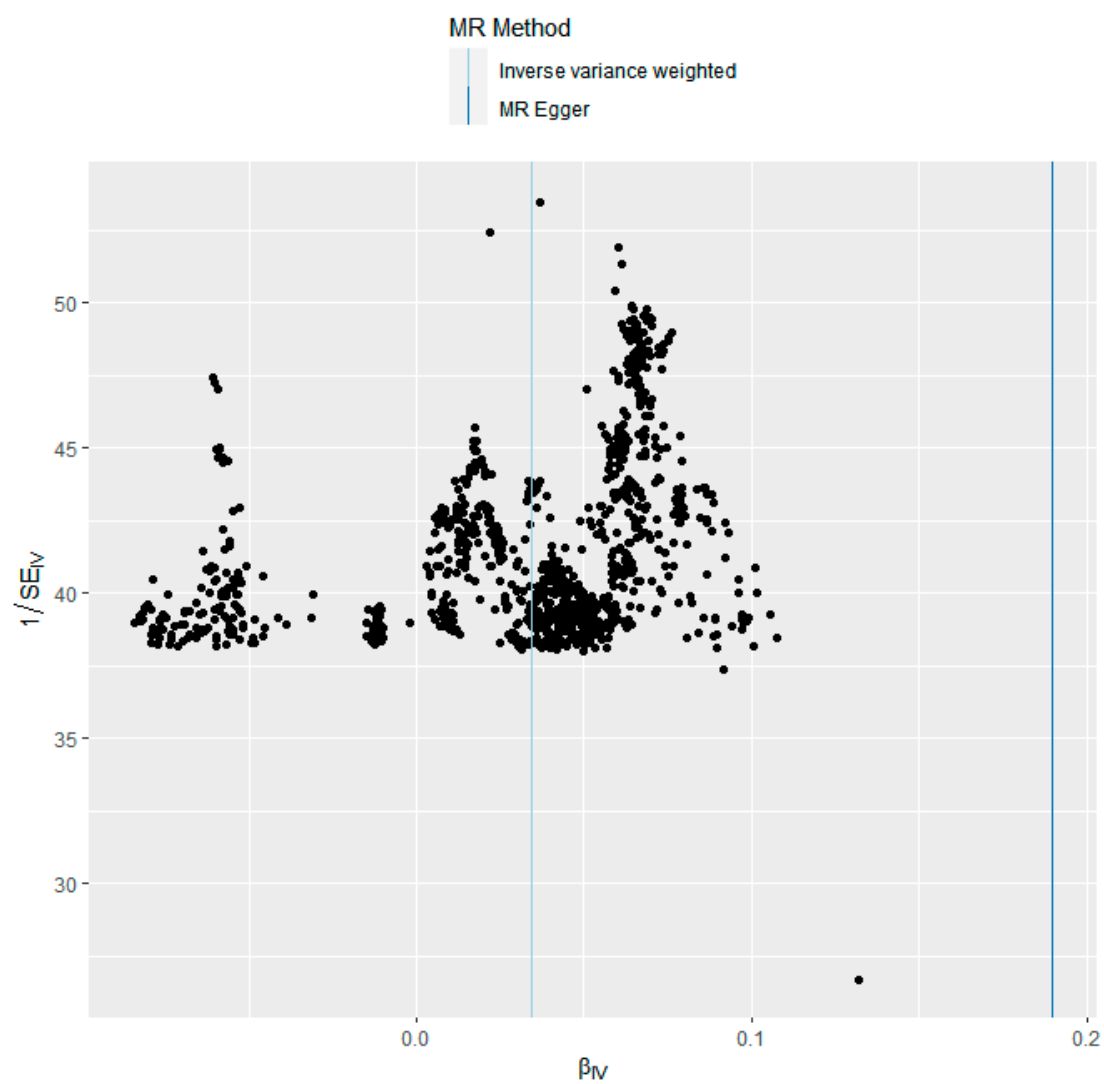

## D:OP and candidate PC39

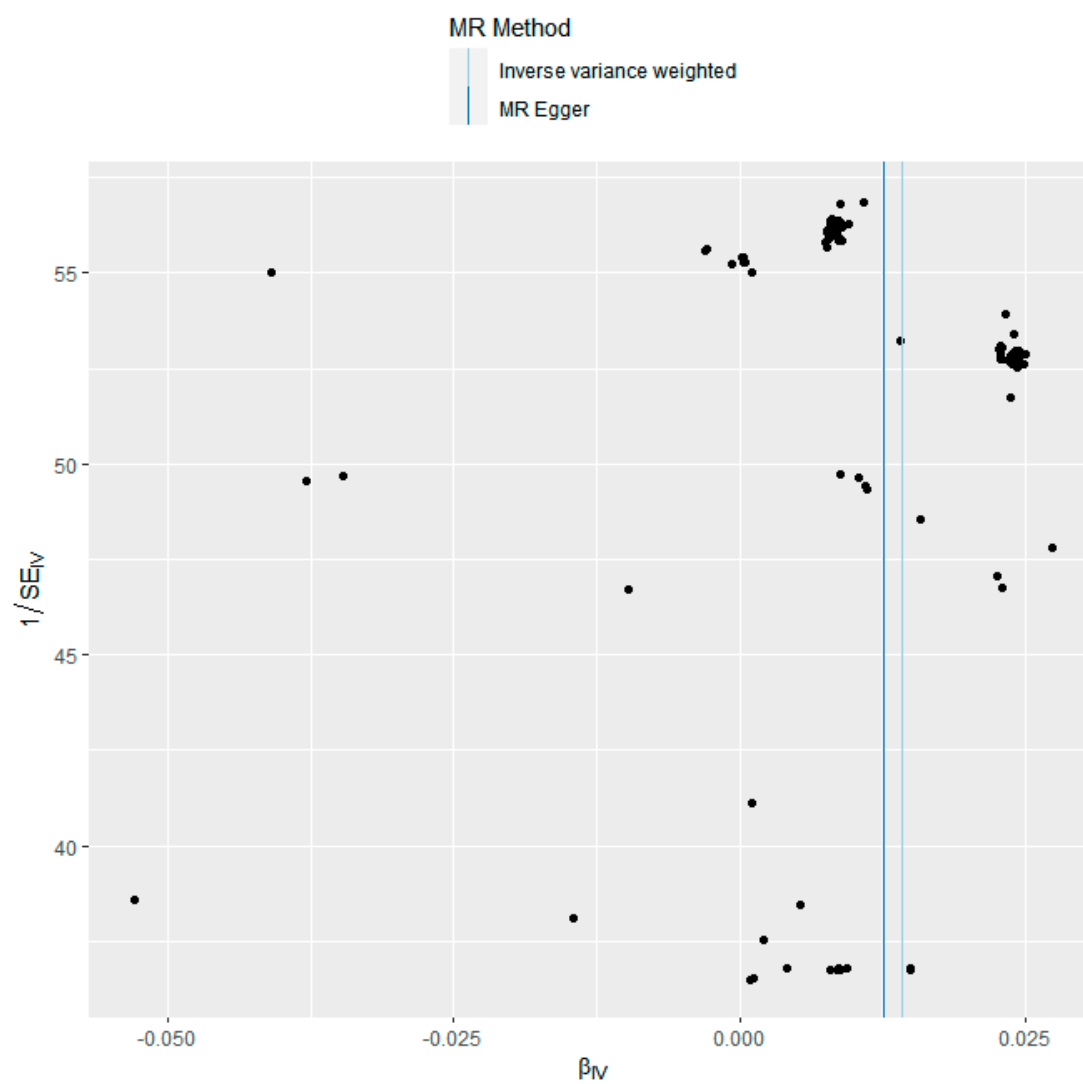

## E:OP and candidate tablespoons of raw vegetables per day

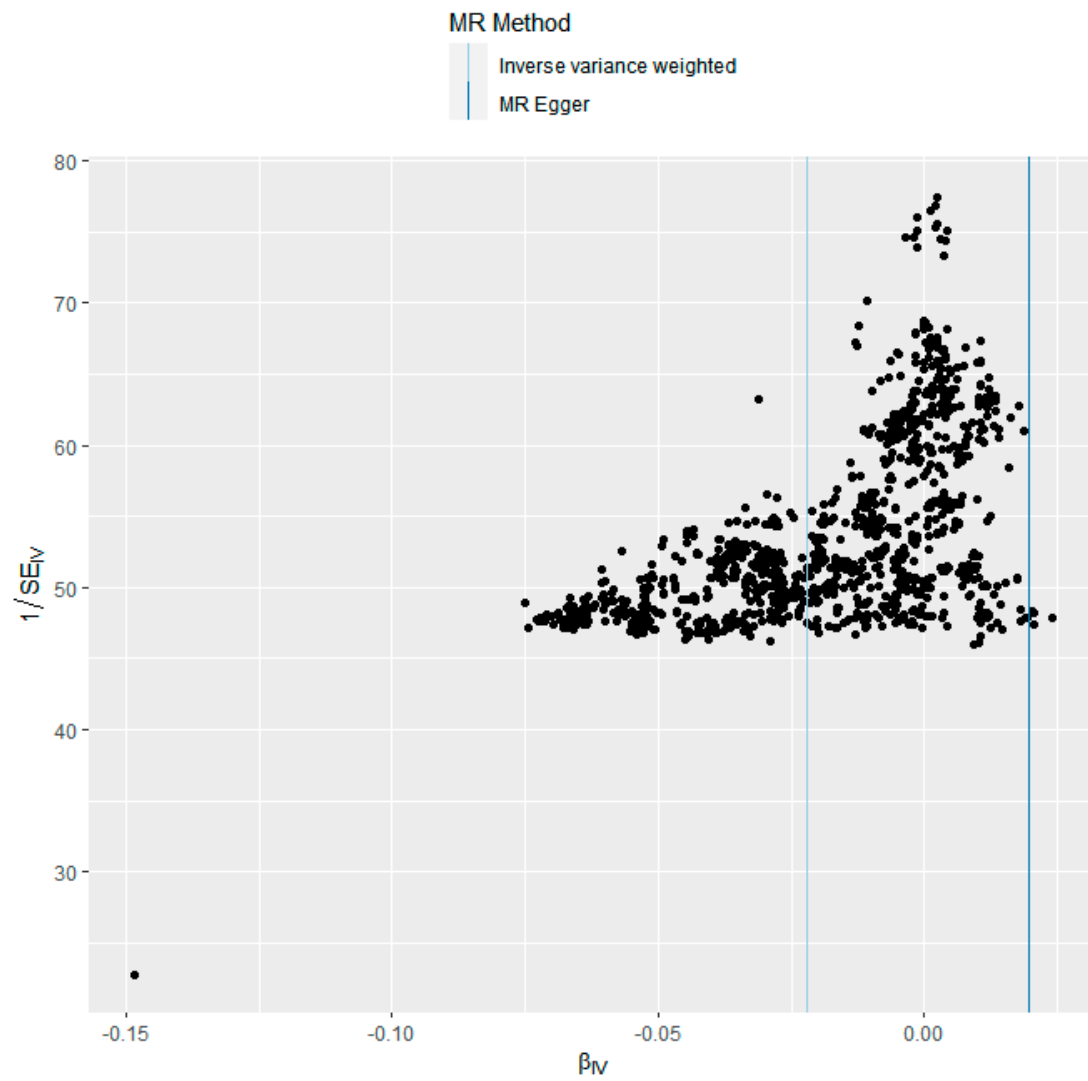

Supplement: s1 [file s1]
