# Supplementary material for: Assessing the Association between Important Dietary Habits and Osteoporosis: A Genetic Correlation and Two-Sample Mendelian Randomization Study
Source: Nutrients. 2022 Jun 27;14(13):2656. doi: 10.3390/nu14132656 (PMC9268345; doi:10.3390/nu14132656)
Supplement: Supplementary file 1 [file nutrients-14-02656-s001.zip › nutrients-1758006-supplementary.xlsx]

## Sheet: Sheet1
Supplemental Table S1. Genetic correlations between dietary habits and osteoporosis
Dietary Habits	Genetic Correlations	P value
PC39	0.1471	0.0099
PC35	-0.1367	0.0114
PC17	-0.136	0.0145
cereal type: biscuit cereal vs. any other	-0.1693	0.0183
spirits measures per month	0.115	0.0353
tablespoons of raw vegetables per day	0.0837	0.0379
PC36	-0.1443	0.0402
PC50	-0.3472	0.0501
milk type: full cream vs. any other	-0.1038	0.0574
overall pork intake	0.0511	0.089
milk type: any milk vs. never	-0.1259	0.0981
never eat sugar vs. no sugar restrictions	0.0652	0.109
bread type: white vs. any other	-0.06	0.1186
PC4	-0.0647	0.124
cereal type: bran cereal vs. any other	0.121	0.1256
alcohol drinker status: current + former vs. never	0.0822	0.141
bread type: white vs. wholemeal/wholegrain + brown	-0.0558	0.1411
PC40	-0.0847	0.1479
never eat eggs vs. no eggs, dairy, wheat, or sugar restrictions	0.1229	0.1634
alcohol drinker status: current vs. never	0.0767	0.1655
PC14	-0.0637	0.1664
milk type: semi-skimmed vs. any other	0.0851	0.167
PC54	0.1568	0.1749
PC28	0.0669	0.1757
frequency of adding salt to food	-0.0505	0.183
PC58	0.1545	0.1856
PC43	-0.0557	0.2008
coffee type: decaffeinated vs. any other	-0.0484	0.202
bread type: wholemeal/wholegrain vs. white + brown	0.0513	0.2042
never eat sugar vs. no eggs, dairy, wheat, or sugar restrictions	-0.0684	0.2062
total drinks of alcohol per month	0.0471	0.2108
cereal type: muesli vs. any other	0.0573	0.2166
milk type: other milk vs. any other	0.1844	0.2302
beer/cider glasses per month	0.0509	0.2326
PC65	0.1481	0.243
PC34	0.0934	0.2453
PC22	-0.0779	0.2496
PC24	-0.0503	0.2506
spread type: low fat spread vs. any other	-0.0893	0.2576
PC29	-0.0631	0.2585
pieces of dried fruit per day	-0.0452	0.2644
PC38	0.0746	0.2776
PC19	-0.0435	0.2856
PC81	0.16	0.2904
PC62	-0.2767	0.2922
PC7	0.0471	0.2945
temperature of hot drinks	0.038	0.309
overall alcohol intake	0.0344	0.3288
spread type: low fat spread vs. never	-0.0648	0.3324
overall processed meat intake	0.0451	0.3352
PC20	-0.0437	0.3363
PC9	-0.047	0.3433
PC11	-0.0396	0.3492
bread type: wholemeal/wholegrain vs. any other	0.0384	0.3536
PC3	0.0322	0.3658
spread type: butter and butter-like spreads vs. oil-based spreads	-0.0508	0.3677
PC1	0.0304	0.3681
never eat dairy vs. no dairy restrictions	-0.0993	0.3839
spread type: olive oil spread vs. any other	-0.0908	0.3843
PC13	-0.0411	0.3971
overall beef intake	0.0355	0.4058
PC2	0.0429	0.4104
overall non-oily fish intake	-0.0435	0.4121
cereal type: oat cereal vs. any other	-0.0531	0.4182
PC27	-0.0388	0.4266
never eat eggs vs. no eggs restrictions	-0.0978	0.4328
PC21	-0.0471	0.4346
PC5	-0.0377	0.4387
slices of bread per week	0.0298	0.4617
PC45	0.0383	0.4627
never eat dairy vs. no eggs, dairy, wheat, or sugar restrictions	-0.0681	0.4721
PC10	-0.0371	0.4845
spread type: butter and margarine spreads vs. oil-based spreads	-0.0361	0.4903
PC42	-0.0508	0.4954
overall cheese intake	-0.0269	0.5054
PC25	-0.0485	0.5113
cups of coffee per day	-0.0296	0.5144
tablespoons of cooked vegetables per day	0.0279	0.5246
PC44	-0.045	0.5259
PC26	0.0301	0.5294
PC23	-0.0408	0.5392
PC15	0.0402	0.5444
PC37	-0.0374	0.5553
PC30	-0.0276	0.5822
PC46	-0.041	0.5822
PC57	0.0425	0.5851
spread type: flora + benecol vs. any other	-0.0468	0.5902
milk type: full cream vs. never	-0.0343	0.5953
spread type: flora + benecol vs. never	-0.0335	0.6062
cups of tea per day	-0.0201	0.6159
PC16	-0.0234	0.6187
milk type: semi-skimmed vs. never	0.0291	0.6362
milk type: soy milk vs. never	0.032	0.6441
PC67	0.0655	0.6476
milk type: skimmed vs. any other	-0.0267	0.6496
PC8	0.0176	0.6564
among current drinkers, drinks usually with meals: yes + it varies vs. no	0.018	0.661
PC49	-0.0404	0.6624
overall oily fish intake	0.0178	0.6781
spread type: other oil-based spread vs. any other	0.0338	0.6801
among current drinkers, drinks usually with meals: yes, it varies, no	-0.0171	0.6873
overall lamb/mutton intake	0.3896	0.6969
bowls of cereal per week	-0.0173	0.7001
overall poultry intake	0.0213	0.7016
glasses of water per day	0.0147	0.7066
PC6	0.0176	0.7199
PC48	0.0501	0.7282
coffee type: ground+instant vs. other+decaff	-0.0212	0.7338
PC47	-0.0338	0.7388
other alcohol glasses per month	0.0396	0.7393
milk type: dairy-based milk vs. never	0.0202	0.7469
spread type: tub margarine vs. never	-0.0154	0.7746
spread type: butter + margarine vs. never	-0.0167	0.7746
PC53	0.0188	0.7758
spread type: olive oil spread vs. never	0.0163	0.7847
spread type: all spreads vs. never	-0.0129	0.7873
milk type: other milk vs. never	-0.0272	0.7949
PC55	-0.0161	0.7975
PC33	0.0135	0.8
cereal type: cornflakes/frosties vs. any other	0.0111	0.8041
spread type: any oil based spread vs. never	0.0127	0.8064
never eat wheat vs. no wheat restrictions	-0.0264	0.8085
never eat eggs vs. no eggs restrictions	-0.0182	0.8238
among current drinkers, drinks usually with meals: yes vs. no	0.0087	0.8277
red wine glasses per month	0.0087	0.83
champagne/white wine glasses per month	0.0099	0.8377
PC18	0.0083	0.8602
milk type: soy milk vs. any other	0.0132	0.8662
spread type: butter vs. never	-0.0073	0.8721
coffee type: ground vs. any other	-0.0093	0.8829
bread type: brown vs. any other	0.0096	0.8902
spread type: tub margarine vs. any other	0.0085	0.892
milk type: skimmed vs. never	0.0085	0.8961
PC12	-0.0064	0.9074
milk type: skimmed, semi-skimmed, full cream (QT)	0.0052	0.9173
PC32	-0.0053	0.9224
PC41	-0.0062	0.9263
never eat wheat vs. no eggs, dairy, wheat, or sugar restrictions	-0.0065	0.9424
pieces of fresh fruit per day	0.0015	0.9681
PC31	0.0013	0.9803
spread type: other oil-based spread vs. never	-0.0012	0.9821
PC52	0.0018	0.9833
spread type: butter vs. any other	0.0006	0.9907
Note: LD score regression software (https://github.com/bulik/ldsc) was used here to evaluate the genetic correlation between dietary habits and osteoporosis (OP).OP: Osteoporosis.
